# Supplementary material
Source: Springer Nature journal article supplement (https://www.springermedizin.de/resource/supplementary/12968_2009_936_MOESM3_ESM.pdf/9580092)

45° Aortic plane

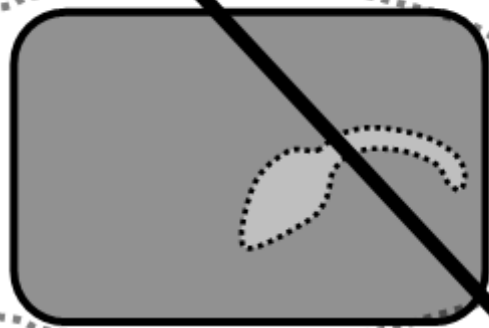

45° MPA plane

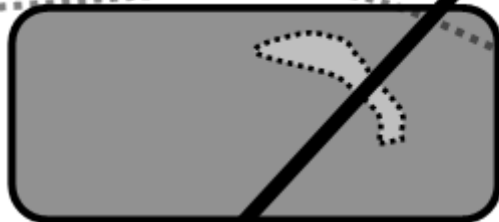

Supplement: MOESM3 [file 9580092]
